# Supplementary material for: Supra-threshold auditory brainstem response amplitudes in humans: Test-retest reliability, electrode montage and noise exposure
Source: PubMed Central journal article supplement (PMC5993871; doi:10.1016/j.heares.2018.04.002), 2018-07
Supplement: mmc1.pdf [file mmc1.pdf]

|        | Mastoid Electrode |                  | Canal Tiptrode   |                  |
|--------|-------------------|------------------|------------------|------------------|
|        | Low noise         | High noise       | Low noise        | High noise       |
| Wave I | 0.94 (0.85/0.98)) | 0.90 (0.73/0.96) | 0.97 (0.91/0.99) | 0.93 (0.81/0.98) |
| Wave V | 0.97 (0.92/0.99)  | 0.95 (0.86/0.98) | 0.92 (0.79/0.97) | 0.95 (0.85/0.98) |
